# Supplementary material
Source: PubMed Central journal article supplement (PMC2224230)
Supplement: pnas_0710604105_2.pdf [file pnas_0710604105_2.pdf]

*Xenia elongata* 18S rDNA partial sequence

5'-TCAGTTATCATTTATTTGATTGTACCACTTACTACTTGGATAACCGTAGTAATTCTAGAG  
CTAATACATGCGAAAAGTCCCGACTTTTTCGCGGAAGGGATGTATTTATTAGATTAAAAACC  
AATGCGGCTTCACGGCCGCTCAACCCATTGGTGATTCATAGTAACCTATTCGAATCGCATG  
GCCTTTTAACTTTGTGCCGGCGATGTTTCATTCAAATTTCTGCCCTATCAACTGTCGATG  
GTAAGGTAGTGGCTTACCATGGTTGCAACGGGTGACGGAGAATTGGGGTTCGATTCCGGA  
GAGGGAGCCTGAGAAACGGCTACCACATCCAAGGAAGGCAGCAGGCGCGCAAATT-3'

*Montipora digitata* 18S rDNA partial sequence

5'-GTTATTTCTTGTCACTACCTCCCTGAGTCAGGATTGGGTAATTTGCGCGCCTGCTGCCTT  
CCTTGGATGTGGTAGCCGTTTCTCAGGCTCCCTCTCCGGAATCGAACCTAATTCTCCGT  
CACCCGTTGCAACCATGGTAAGCCACTACCTTACCATCGACAGTTGATAGGGCAGAAATT  
TGAATGAAACATCGCCAGCGCAAGGCCGTGCGATTCGATCAGTTACTATGAATCACCAA  
GACACCGGGCAGAACCCGCATTGGTTTTTAATCTAATAAATACATCCCTTCCAGAAGTCG  
GGACTTTTCGCATGTATTAGCTCTAGAATTACTACGGTTATCCAAGTAGTAATGGTACAA  
TCAAATAAACGATAACTGATTTAATGAGCCATTCGCAGTTTCACAGTACTAGTGCTTATA  
CTTAGACATGCATGGCTTAATCTTTGAGACAAGCATATGACTACTGGCAGGATCAACCAG  
GT-3'
