# Supplementary material
Source: PubMed Central journal article supplement (PMC2224230)

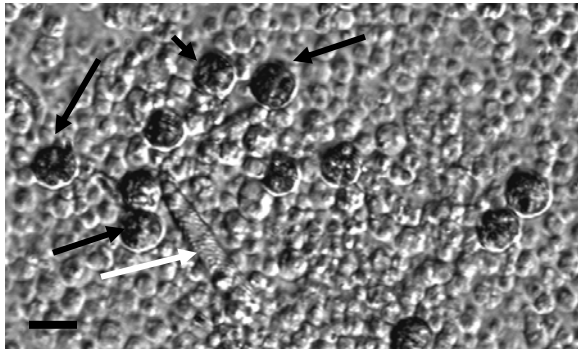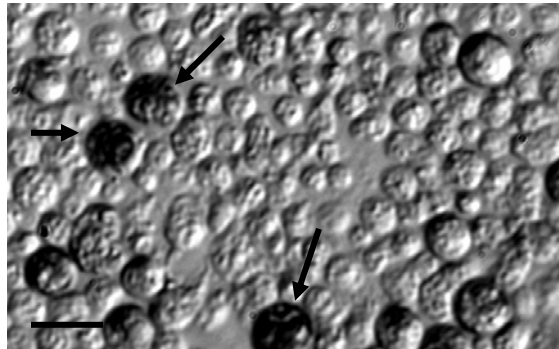

Supplement: pnas_0710604105_1.pdf [file pnas_0710604105_1.pdf]

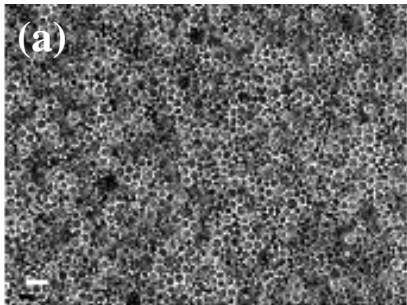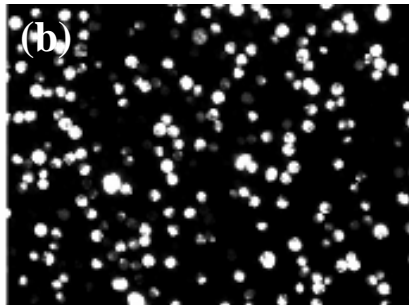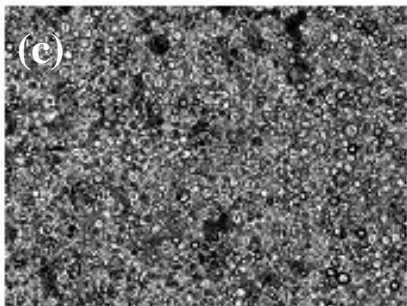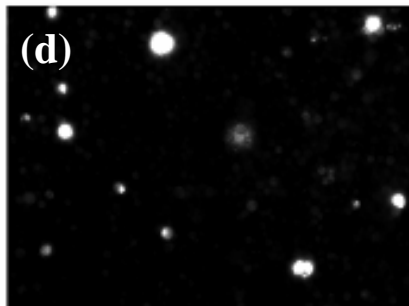

Supplement: pnas_0710604105_3.pdf [file pnas_0710604105_3.pdf]

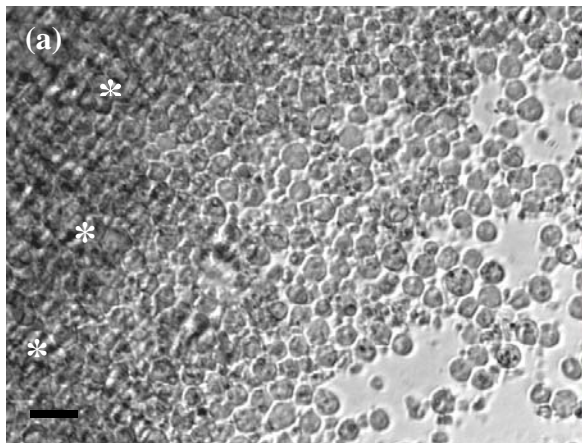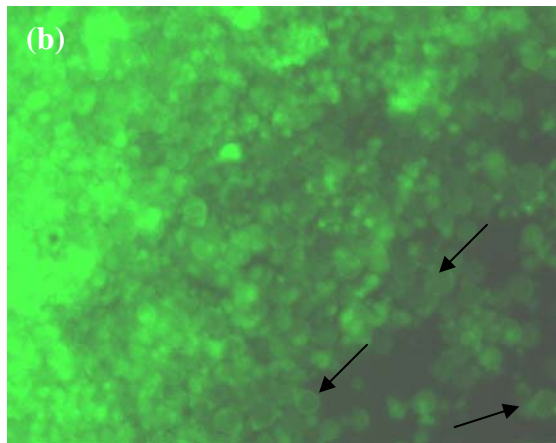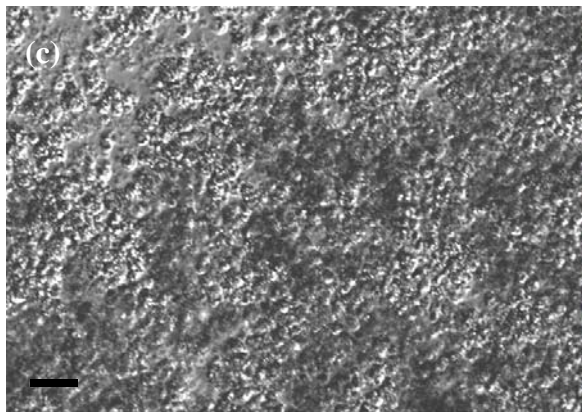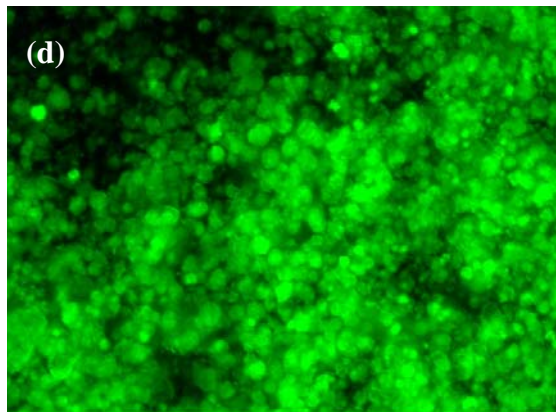

Supplement: pnas_0710604105_4.pdf [file pnas_0710604105_4.pdf]

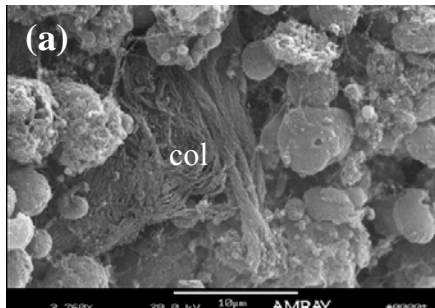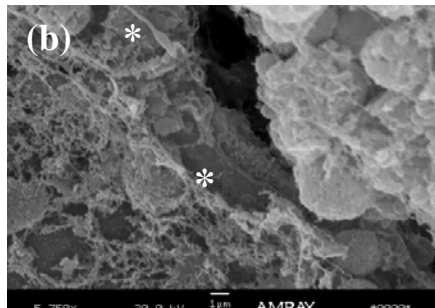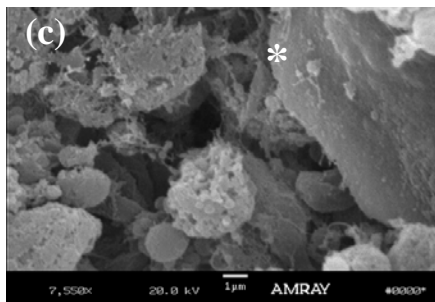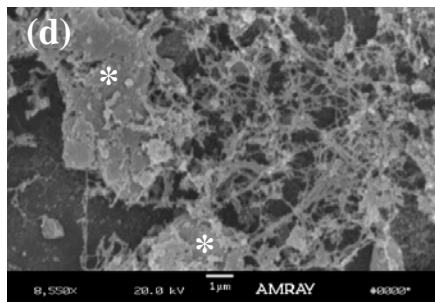

Supplement: pnas_0710604105_5.pdf [file pnas_0710604105_5.pdf]
